# Supplementary material for: Impact of Rhythm vs. Rate Control in Atrial Fibrillation on the Long-Term Outcome of Patients Undergoing Transcatheter Edge-to-Edge Mitral Valve Repair
Source: MDPI journal article supplement (doi:10.3390/jcm10215044), 2021-10-28
Supplement: s1 [file s1]

**Table S1.** Baseline characteristics of patients with permanent and non-permanent AF before and after propensity score matching.

|                               | before propensity score matching   |                                |                 | after propensity score matching    |                                |                 |
|-------------------------------|------------------------------------|--------------------------------|-----------------|------------------------------------|--------------------------------|-----------------|
|                               | non-permanent AF<br><i>n</i> = 221 | permanent AF<br><i>n</i> = 152 | <i>p</i> -value | non-permanent AF<br><i>n</i> = 152 | permanent AF<br><i>n</i> = 152 | <i>p</i> -value |
| Age (years)                   | 77.9 ± 7.6                         | 79.1 ± 6.9                     | 0.1             | 77.5 ± 6.6                         | 79.1 ± 6.9                     | 0.1             |
| Male sex                      | 58.4%                              | 71.1%                          | 0.04            | 66.4%                              | 71.1%                          | 0.5             |
| EuroSCORE II<br>(Q1; Q3)      | 19.6%<br>(9.4-32.7)                | 20.1%<br>(14.2; 37)            | 0.6             | 20%<br>(9.47; 23.64)               | 20.1%<br>(14.2; 37)            | 0.4             |
| STS-Risk-Score<br>(Q1; Q3)    | 6.7%<br>(4.2-12.8)                 | 8.5%<br>(5.1; 15.3)            | 0.2             | 6.4%<br>(4.2; 12.8)                | 8.5%<br>(5.1; 15.3)            | 0.06            |
| NYHA class I                  | 0.5%                               | 0%                             | 1               | 0.7%                               | 0%                             | 1               |
| NYHA class II                 | 5%                                 | 4%                             |                 | 3.9%                               | 4%                             |                 |
| NYHA class III                | 69.6%                              | 70.4%                          |                 | 71.1%                              | 70.4%                          |                 |
| NYHA class IV                 | 24.9%                              | 25.7%                          |                 | 24.3%                              | 25.7%                          |                 |
| COPD                          | 17.7%                              | 23%                            | 0.3             | 22.4%                              | 23%                            | 1               |
| Coronary artery disease       | 62.4%                              | 64.5%                          | 0.8             | 64.5%                              | 64.5%                          | 1               |
| Prior CABG surgery            | 22.6%                              | 25%                            | 0.6             | 31.6%                              | 25%                            | 0.1             |
| Prior PCI                     | 55.2%                              | 48.7%                          | 0.3             | 55.9%                              | 48.7%                          | 0.4             |
| Diabetes mellitus             | 30.3%                              | 36.2%                          | 0.2             | 30.9%                              | 36.2%                          | 0.3             |
| Art. Hypertension             | 79.2%                              | 81.6%                          | 0.8             | 76.3%                              | 81.6%                          | 0.3             |
| Prior Stroke                  | 10.4%                              | 11.2%                          | 0.8             | 9.9%                               | 11.2%                          | 0.9             |
| Pre-existing ICD              | 28.1%                              | 25.7%                          | 0.8             | 34.9%                              | 25.7%                          | 0.1             |
| Pre-existing CRT              | 13.6%                              | 9.2%                           | 0.2             | 16.4%                              | 9.2%                           | 0.06            |
| GFR >60 mL/Min                | 21.7%                              | 27.0%                          | 0.4             | 23%                                | 27.0%                          | 0.7             |
| GFR 30-59 mL/Min              | 59.3%                              | 52.6%                          |                 | 57.2%                              | 52.6%                          |                 |
| GFR <30 mL/Min                | 18.6%                              | 20.4%                          |                 | 19.7%                              | 20.4%                          |                 |
| NT-pro BNP (ng/L)<br>(Q1; Q3) | 2951<br>(1231; 5521)               | 2921<br>(1248; 5938)           | 0.6             | 3000<br>(933; 5771)                | 2921<br>(1248; 5935)           | 0.3             |
| LV function > 45%             | 40.3%                              | 44.1%                          | 0.8             | 32.9%                              | 44.1%                          | 0.1             |
| LV function 30-44%            | 33%                                | 33.6%                          |                 | 35.5%                              | 33.6%                          |                 |

|                                                     |           |          |        |          |          |        |
|-----------------------------------------------------|-----------|----------|--------|----------|----------|--------|
| LV function < 30%                                   | 26.7%     | 22.3%    |        | 31.6%    | 22.3%    |        |
| TR grade III                                        | 15.8%     | 29.6%    | <0.001 | 13.8%    | 29.6%    | <0.001 |
| Degenerative MR etiology                            | 28.5%     | 26.3%    |        | 20.4%    | 26.3%    |        |
| Functional MR etiology                              | 63.4%     | 65.8%    | 0.8    | 70.4%    | 65.8%    | 0.4    |
| Combined MR etiology                                | 8.1%      | 7.9%     |        | 9.2%     | 7.9%     |        |
| <b>Procedural characteristics</b>                   |           |          |        |          |          |        |
| Mean procedure duration (min)                       | 105 ± 60  | 117 ± 75 | 0.1    | 112 ± 73 | 115 ± 73 | 0.7    |
| Postinterventional no MR                            | 27.1%     | 22.4%    |        | 27.6%    | 22.4%    |        |
| Postinterventional MR grade I                       | 62.3%     | 62.5%    | 0.2    | 64.5%    | 62.5%    | 0.1    |
| Postinterventional MR grade II                      | 9.5%      | 14.5%    |        | 7.9%     | 14.5%    |        |
| Postinterventional MR grade III                     | 0%        | 0.7%     |        | 0%       | 0.7%     |        |
| Length of hospital stay (days)                      | 7         | 7        |        | 7        | 7        |        |
| (Q1; Q3)                                            | (5; 10)   | (5; 11)  | 0.3    | (5; 10)  | (5; 11)  | 0.7    |
| MACCE                                               | 5.4% (12) | 2%       | 0.053  | 5.3%     | 2%       | 0.1    |
| In-hospital death from any cause                    | 4.5%      | 3.3%     | 0.4    | 3.3%     | 3.3%     | 1      |
| <b>Heart Failure and anti-arrhythmic medication</b> |           |          |        |          |          |        |
| ACE-/AT1 Inhibitors                                 | 76.2%     | 72.4%    | 0.6    | 73%      | 72.4%    | 0.8    |
| ARN Inhibitor                                       | 7.7%      | 8.6%     | 0.7    | 9.9%     | 8.6%     | 0.8    |
| Beta Blockers                                       | 88.7%     | 87.5%    | 0.2    | 89.5%    | 87.5%    | 0.7    |
| Loop diuretics                                      | 90.1%     | 90.8%    | 0.9    | 88.8%    | 90.8%    | 0.7    |
| Thiazid diuretics                                   | 18.1%     | 25.7%    | 0.2    | 17.1%    | 25.7%    | 0.1    |
| Aldosteron antagonists                              | 48.9%     | 47.4%    | 0.9    | 51.3%    | 47.4%    | 0.6    |
| Ivabradin                                           | 0.9%      | 0%       | 0.2    | 1.3%     | 0%       | 0.5    |
| Digitalis                                           | 5.4%      | 17.8%    | <0.001 | 4.6%     | 17.8%    | <0.001 |
| <b>Oral Anticoagulation</b>                         | 89.5%     | 92.3%    | 0.3    | 89.5%    | 92.8%    | 0.3    |

Data presented as percentages, mean ± SD or median with first quartile and third quartile 3 (Q1; Q3). AF—atrial fibrillation. NYHA—New York Heart Association. COPD—chronic obstructive pulmonary disease. CABG—coronary artery bypass graft surgery. PCI—percutaneous coronary intervention. ICD—implantable cardioverter defibrillator. CRT—cardiac resynchronization therapy. GFR—glomerular filtration rate. NT-proBNP—N-terminal-pro hormone brain natriuretic peptide. LV function – left ventricular function. TR—tricuspid regurgitation. MR—mitral regurgitation. MACCE—major adverse cardiac and cerebrovascular events. ACE—angiotensin converting enzyme. AT1—angiotensin II type 1 receptor. ARN—angiotensin receptor neprylisin.

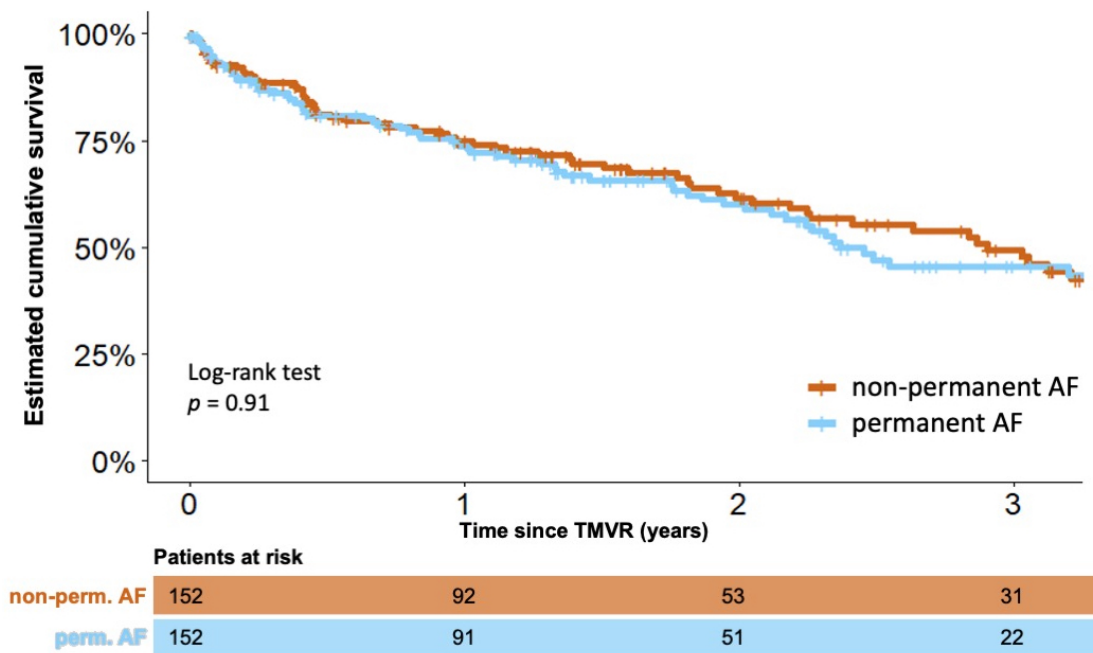

**Figure S1.** Estimated cumulative survival of patients with permanent and non-permanent atrial fibrillation (AF). Kaplan-Meier plots of patients with permanent and non-permanent AF after propensity score matching (PSM). TMVR—transcatheter mitral valve repair.

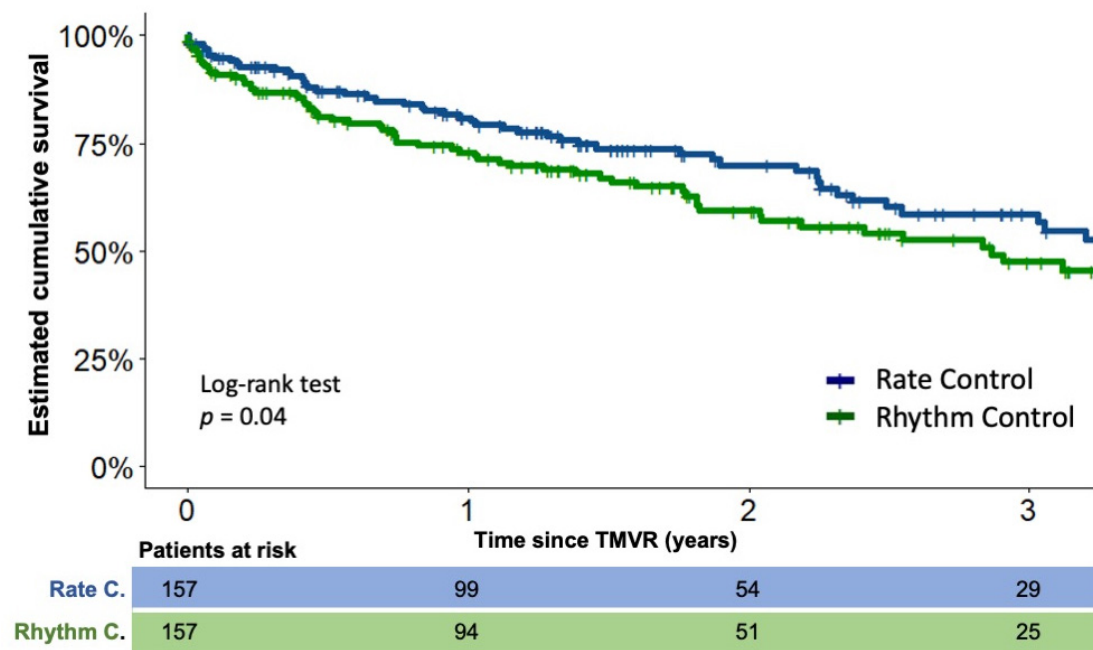

**Figure S2.** Estimated cumulative survival of patients under rate and rhythm control therapy after exclusion of patients with concomitant ventricular tachycardia. Kaplan-Meier plots of patients under rate and under rhythm control therapy after exclusion of patients with concomitant ventricular tachycardia and after propensity score matching (PSM). TMVR—transcatheter mitral valve repair.
